# Supplementary material
Source: publisher figshare collection journal article supplement (https://sage.figshare.com/ndownloader/files/12393365)
Supplement: Supplementary file 1 [file 12393365]

| Graft level with surrounding cartilage | |
| --- | --- |
| Level | 2 |
| Raised | 1 |
| Below | 0 |
|  | |
| Integration with surrounding cartilage | |
| Complete | 2 |
| Minor disruption (<25% of area) | 1 |
| Major disruption (>25% of area) | 0 |
|  | |
| Appearance of surface | |
| Smooth | 2 |
| Fine fronds | 1 |
| Severe fronds/fibrillation | 0 |
|  | |
| Color of graft | |
| Pearly, hyaline-like | 2 |
| White | 1 |
| Yellow bone | 0 |
| Total | 8 |

Table S1. Modified Oswestry Arthroscopy Score. Stiffness on probing was excluded from the original scoring system in our study, because cartilage electromechanical properties were evaluated using Arthro-BST.
